# Supplementary material for: Monodisperse polylactide microcapsules with a single aqueous core prepared via spontaneous emulsification and solvent diffusion
Source: Royal Society of Chemistry journal article supplement (doi:10.1039/c3ra44066d), 2013-12-10
Supplement: c3ra44066d.pdf [file c3ra44066d.pdf]

Supplementary Information (ESI) for RSC Advances

## Supplementary Information

### Monodisperse polylactide microcapsules with a single aqueous core prepared via spontaneous emulsification and solvent diffusion

Takaichi Watanabe,<sup>a</sup> Yukitaka Kimura,<sup>b</sup> and Tsutomu Ono\*<sup>a</sup>

<sup>a</sup>Department of Applied Chemistry and Biotechnology, Graduate School of Natural Science and Technology, Okayama University, 3-1-1 Tsushima-naka, Kita-ku, Okayama, 700-8530, Japan. Tel&Fax: +81 86 251 8083; E-mail: [tono@cc.okayama-u.ac.jp](mailto:tono@cc.okayama-u.ac.jp)

<sup>b</sup>Department of Material and Energy Science, Graduate School of Environmental and Life Science, Okayama University, 3-1-1 Tsushima-Naka, Kita-ku, Okayama 700-8530, Japan

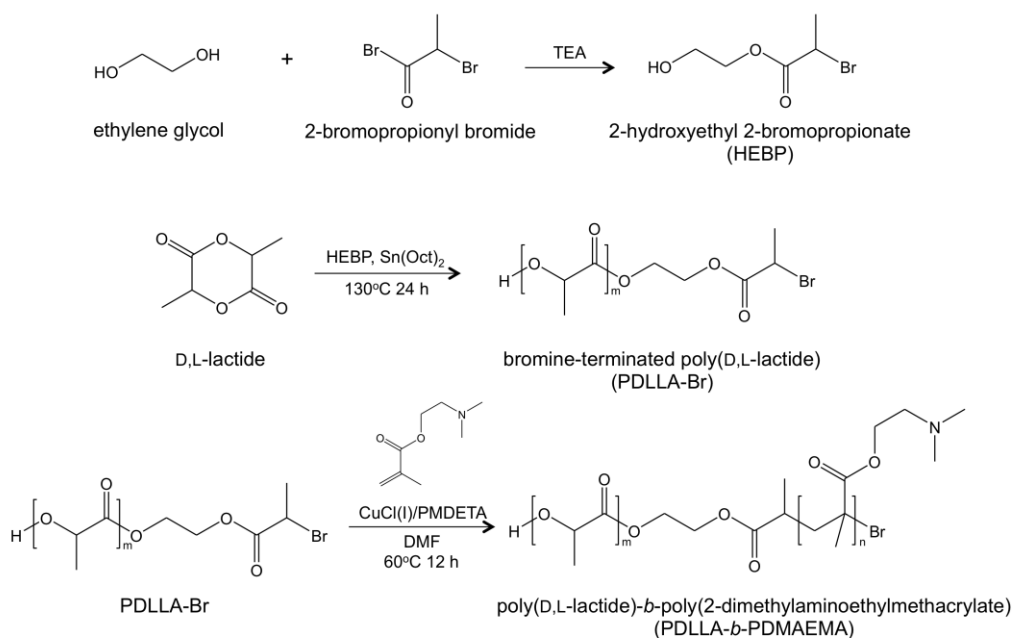

Scheme S1 Synthesis of poly(D,L-lactide)-*b*-poly(2-dimethylaminoethylmethacrylate).

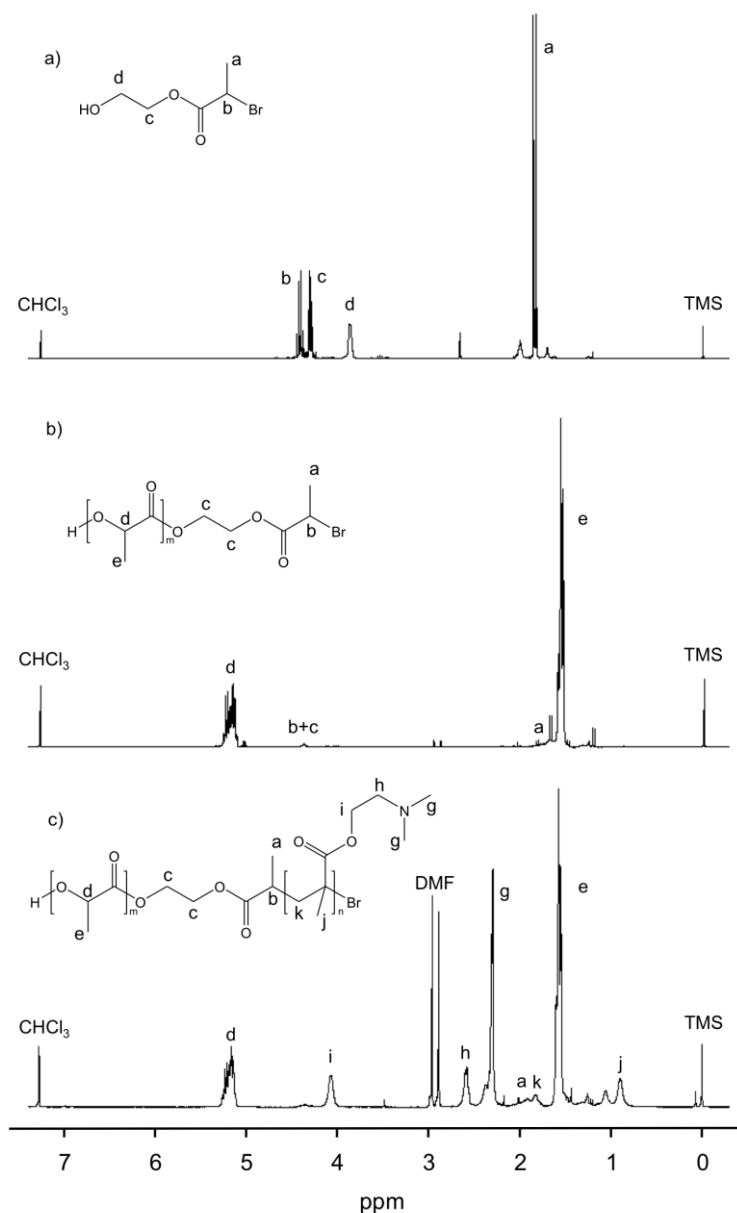

**Figure S1** <sup>1</sup>H NMR spectra of (a) HEBP, (b) PDLLA-Br, and (c) PDLLA-*b*-PDMAEMA in CDCl<sub>3</sub>.

**Table S1** Synthetic result of PDLLA-*b*-PDMAEMA

| Sample                   | <i>M</i> <sub>n</sub> (PDLLA block) | <i>M</i> <sub>n</sub> (PDMAEMA block) | <i>M</i> <sub>n</sub> (diblock) | <i>M</i> <sub>w</sub> / <i>M</i> <sub>n</sub> |
|--------------------------|-------------------------------------|---------------------------------------|---------------------------------|-----------------------------------------------|
| PDLLA- <i>b</i> -PDMAEMA | 9,600                               | 6,600                                 | 16,200                          | 1.28                                          |

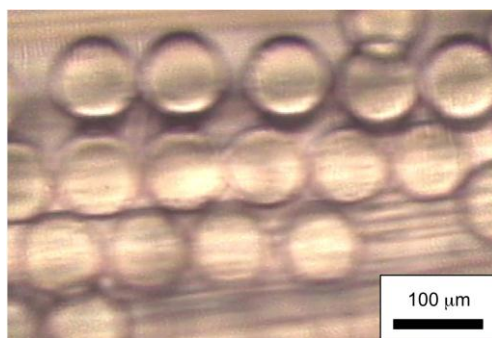

**Figure S2** Optical micrograph of monodisperse oil droplets dispersed in the aqueous phase before solvent diffusion, captured in the Teflon tube connected from the outlet of the microfluidic device to the vessel containing water for solvent diffusion. The dispersed phase was an EA solution dissolving  $6 \text{ mg mL}^{-1}$  of PDLLA and  $4 \text{ mg mL}^{-1}$  of PDLLA-*b*-PDMAEMA. The continuous phase was an aqueous solution saturated with EA containing 1 wt% of w-PEG-*b*-PDLLA. The flow rates were  $Q_d = 120 \text{ } \mu\text{L h}^{-1}$ ,  $Q_c = 3.0 \text{ mL h}^{-1}$ .

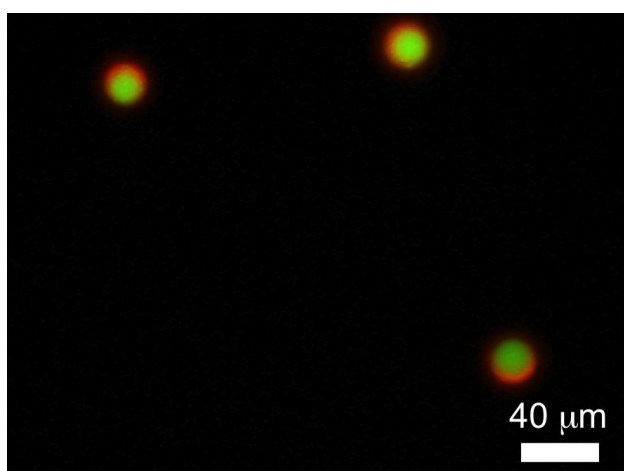

**Figure S3** Fluorescence microscopic image of monodisperse microcapsules with containing fluorocein in the core and Nile red in the shell.
